# Supplementary material for: Buoyant force-induced continuous floating and sinking of Janus micromotors
Source: Royal Society of Chemistry journal article supplement (doi:10.1039/c8ra05844j), 2018-01-01
Supplement: c8ra05844j8.pdf [file c8ra05844j8.pdf]

## Electronic Supplementary Information

### Buoyant Force-Induced Continuous Floating and Sinking of Janus Micromotors

Meisheng Wu<sup>a,b,\*</sup>, Yuki Koizumi<sup>a</sup>, Hiroki Nishiyama<sup>a</sup>, Ikuyoshi Tomita<sup>a</sup>, Shinsuke Inagi<sup>a,\*</sup>

<sup>a</sup>Department of Chemical Science and Engineering, School of Materials and Chemical Technology, Tokyo Institute of Technology, 4259 Nagatsuta-cho, Midori-ku, Yokohama 226-8502, Japan

<sup>b</sup>Department of Chemistry, College of Sciences, Nanjing Agricultural University, 1 Weigang, Nanjing 210095, P.R. China.

**Movie S1.** Side view of Au-GCB-Pt in 0.526% H<sub>2</sub>O<sub>2</sub> solution, mixture solution of 0.526% H<sub>2</sub>O<sub>2</sub> and 0.021 g/L SDS, mixture solution of 0.526% H<sub>2</sub>O<sub>2</sub>, 0.021 g/L SDS and 0.185 M Na<sub>2</sub>SO<sub>4</sub>, and mixture solution of 0.526% H<sub>2</sub>O<sub>2</sub> and 0.185 M Na<sub>2</sub>SO<sub>4</sub>.

**Movie S2.** Orientation of Au-GCB-Pt in fuel solution containing 0.526% H<sub>2</sub>O<sub>2</sub>, 0.021 g/L SDS and 0.185 M Na<sub>2</sub>SO<sub>4</sub>.

**Movie S3.** Top view of Au-GCB-Pt in fuel solution containing 0.526% H<sub>2</sub>O<sub>2</sub>, 0.021 g/L SDS and 0.185 M Na<sub>2</sub>SO<sub>4</sub>.

**Movie S4.** Motion performance of Au-GCB-Pt placed on solution surface and in solution. Fuel solution contains 0.526% H<sub>2</sub>O<sub>2</sub>, 0.021 g/L SDS and 0.185 M Na<sub>2</sub>SO<sub>4</sub>.

**Movie S5.** Motion of Au-GCB-Pt with different surface coverage of Pt. Au was deposited at 50 V for 2 min. The deposition voltage for Pt was 30, 40, 50, 60 and 70 V, respectively. Fuel solution contains 0.526% H<sub>2</sub>O<sub>2</sub>, 0.021 g/L SDS and 0.185 M Na<sub>2</sub>SO<sub>4</sub>.

**Movie S6.** Swimming of Au-GCB-Pt in fuel solution containing 0.526% H<sub>2</sub>O<sub>2</sub>, 0.021 g/L SDS and 0.185 M Na<sub>2</sub>SO<sub>4</sub> after 10 min, 1 h, and 3 h.

**Movie S7.** Swimming of Au-GCB-Pt in fuel solution containing 0.526% H<sub>2</sub>O<sub>2</sub>, 0.021 g/L SDS and 0.185 M electrolytes (H<sub>2</sub>SO<sub>4</sub>, NaCl and NaHCO<sub>3</sub>).

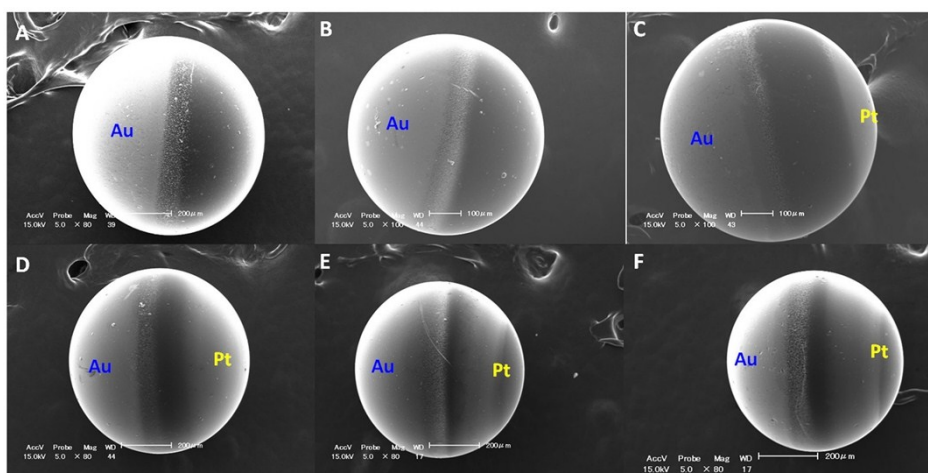

**Fig.S1.** SEM images of Au-GCB (A) and Au-GCB-Pt (B to F). Au was deposited at 50 V for 2 min. The deposition voltage of Pt NPs from (B) to (F) was 30, 40, 50, 60 and 70 V, respectively. The deposition time of Pt was 2 min.

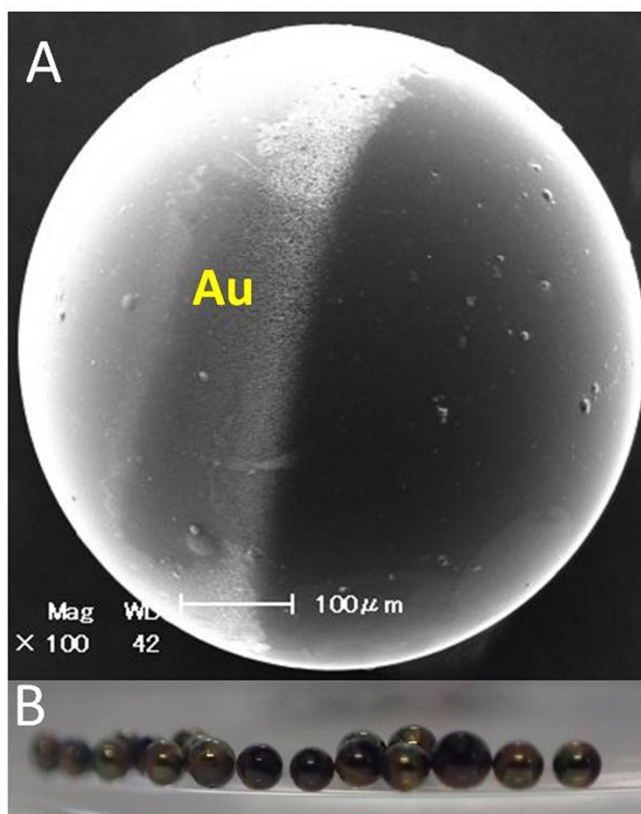

**Fig.S2** (A) SEM image of Au-GCB-Pt. (B) Au-GCB-Pt in fuel solution containing 0.526%  $\text{H}_2\text{O}_2$ , 0.021 g/L SDS, and 0.185 M  $\text{Na}_2\text{SO}_4$ . The volume of fuel solution was 6.0 mL. The deposition voltages for Au and Pt were 50 and 20 V, respectively.

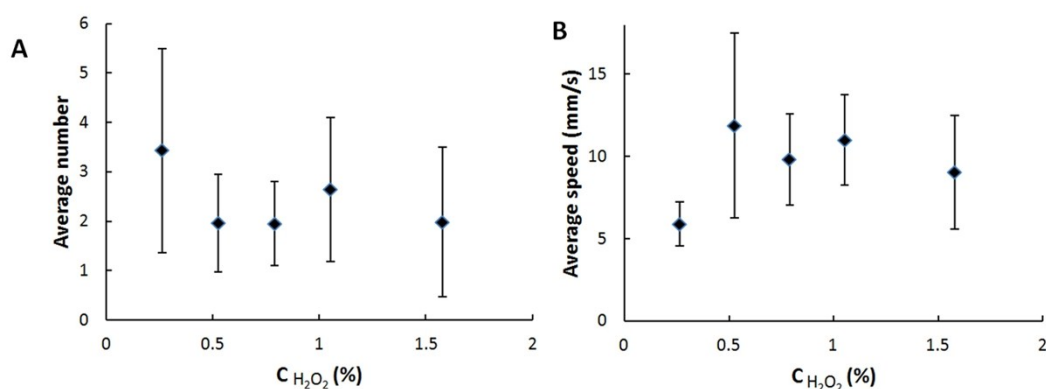

**Fig.S3.** (A) Average number of Au-GCB-Pt moved in each frame as a function of  $\text{H}_2\text{O}_2$  concentration. (B) Average speed of Au-GCB-Pt in fuel solution. The concentration of SDS was 0.021 g/L. The concentration of  $\text{Na}_2\text{SO}_4$  was 0.185 M.

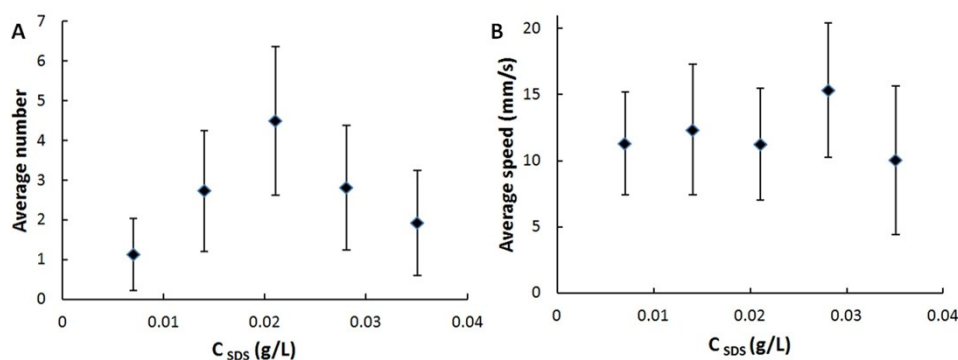

**Fig.S4.** (A) average number of Au-GCB-Pt moved in each frame as a function of SDS concentration. (B) Average speed of Au-GCB-Pt in fuel solution. The concentration of  $\text{H}_2\text{O}_2$  was 0.526%. The concentration of  $\text{Na}_2\text{SO}_4$  was 0.185 M.

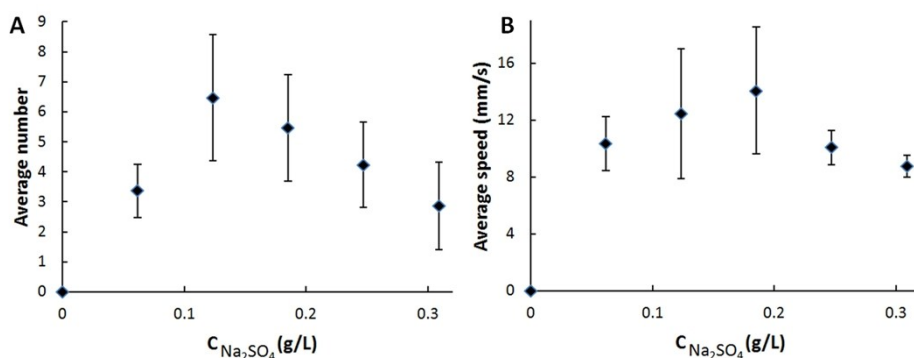

**Fig.S5.** (A) average number of Au-GCB-Pt moved in each frame as a function of  $\text{Na}_2\text{SO}_4$  concentration. (B) Average speed of Au-GCB-Pt in fuel solution. The concentration of  $\text{H}_2\text{O}_2$  was 0.526%. The concentration of SDS was 0.021 g/L.

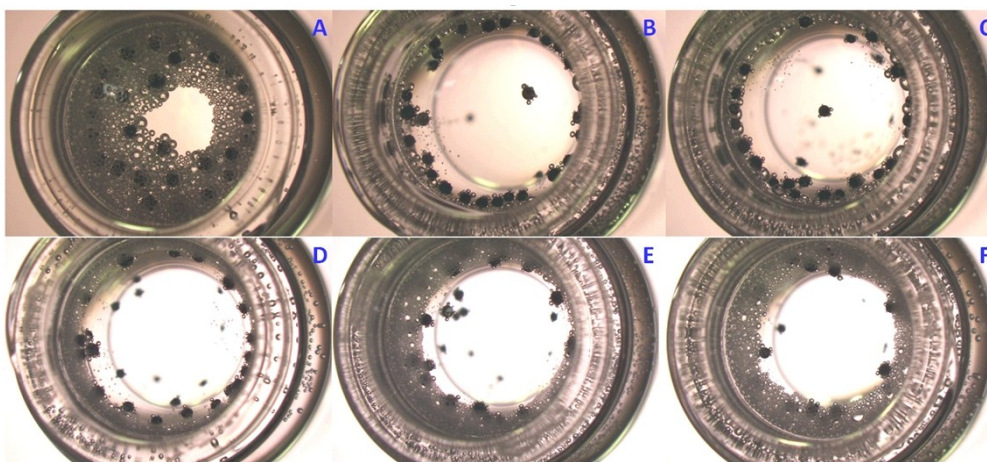

**Fig.S6.** Top view of Au-GCB-Pt in fuel solution. The concentration of  $\text{H}_2\text{O}_2$  was 0.526%. The concentration of SDS was 0.021 g/L. The concentration of  $\text{Na}_2\text{SO}_4$  from A to F was 0, 0.062, 0.123, 0.185, 0.247, and 0.308 M, respectively.

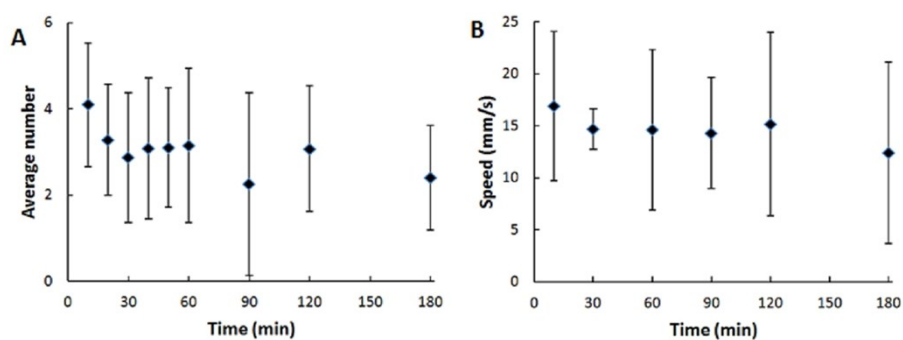

**Fig.S7.** (A) Average number of Au-GCB-Pt moved in each frame and (B) Average speed of Au-GCB-Pt in fuel solution containing 0.526%  $\text{H}_2\text{O}_2$ , 0.021 g/L SDS and 0.185 M  $\text{Na}_2\text{SO}_4$ .
